# Supplementary material
Source: MDPI journal article supplement (https://www.mdpi.com/2072-4292/13/21/4397)

## Supplementary Materials for:

### Scale and landscape features matter for understanding waterbird habitat selection

**Table S1.**

AUC for optimized scale selection of the variables for foraging state.

| Variable | Scale | CLASS LEVEL METRICS |               |               |               |               |               |               |               |               |
|----------|-------|---------------------|---------------|---------------|---------------|---------------|---------------|---------------|---------------|---------------|
|          |       | Artificial          | Forest        | Grassland     | Lake          | Marsh         | Mudflat       | Paddy field   | Pond          | River         |
| AI       | 1.5   | 0.6823              | 0.5944        | 0.7484        | 0.6699        | 0.7526        | 0.7602        | 0.7014        | 0.6894        | 0.6919        |
|          | 3.0   | 0.7503              | 0.6767        | 0.7502        | 0.7255        | 0.7479        | 0.7663        | 0.7298        | 0.7100        | 0.7256        |
|          | 5.0   | <b>0.7737</b>       | 0.7421        | <b>0.7582</b> | <b>0.7536</b> | <b>0.7526</b> | <b>0.7732</b> | 0.7317        | 0.7343        | <b>0.7384</b> |
|          | 8.0   | 0.7554              | <b>0.7602</b> | 0.7521        | 0.7518        | 0.7461        | 0.7549        | <b>0.7364</b> | <b>0.7369</b> | 0.7341        |
|          | 10.0  | 0.7297              | 0.7377        | 0.7288        | 0.7317        | 0.7255        | 0.7305        | 0.7215        | 0.7219        | 0.7315        |
| AM       | 1.5   | 0.7070              | 0.6271        | 0.7468        | 0.6750        | 0.7549        | 0.7608        | 0.7115        | 0.6926        | 0.7048        |
|          | 3.0   | 0.7604              | 0.7141        | 0.7579        | 0.7292        | 0.7492        | 0.7611        | <b>0.7428</b> | 0.7055        | 0.7247        |
|          | 5.0   | <b>0.7755</b>       | <b>0.7670</b> | <b>0.7636</b> | <b>0.7585</b> | <b>0.7511</b> | <b>0.7648</b> | 0.7413        | 0.7277        | <b>0.7447</b> |
|          | 8.0   | 0.7559              | 0.7601        | 0.7495        | 0.7564        | 0.7405        | 0.7501        | 0.7316        | <b>0.7291</b> | 0.7322        |
|          | 10.0  | 0.7328              | 0.7336        | 0.7282        | 0.7367        | 0.7191        | 0.7275        | 0.7202        | 0.7147        | 0.7272        |
| COHESION | 1.5   | 0.6920              | 0.6000        | 0.7381        | 0.6801        | 0.7527        | 0.7679        | 0.7071        | 0.6963        | 0.6987        |
|          | 3.0   | 0.7548              | 0.6759        | 0.7535        | 0.7316        | 0.7522        | 0.7680        | <b>0.7424</b> | 0.7235        | 0.7255        |
|          | 5.0   | <b>0.7692</b>       | 0.7428        | <b>0.7592</b> | <b>0.7618</b> | <b>0.7609</b> | <b>0.7728</b> | 0.7342        | <b>0.7397</b> | <b>0.7491</b> |
|          | 8.0   | 0.7479              | <b>0.7591</b> | 0.7465        | 0.7537        | 0.7491        | 0.7555        | 0.7311        | 0.7312        | 0.7392        |
|          | 10.0  | 0.7255              | 0.7337        | 0.7238        | 0.7339        | 0.7289        | 0.7334        | 0.7201        | 0.7181        | 0.7210        |
| ED       | 1.5   | 0.8105              | 0.6928        | 0.8189        | 0.7565        | 0.8999        | 0.9080        | 0.8026        | 0.8323        | 0.8069        |
|          | 3.0   | 0.8828              | 0.8232        | 0.8580        | 0.8139        | 0.9105        | 0.9200        | 0.8340        | 0.8586        | 0.8494        |
|          | 5.0   | <b>0.9069</b>       | <b>0.9069</b> | <b>0.8813</b> | 0.8632        | <b>0.9130</b> | <b>0.9274</b> | <b>0.8559</b> | <b>0.8651</b> | <b>0.8833</b> |
|          | 8.0   | 0.8883              | 0.8989        | 0.8706        | <b>0.8705</b> | 0.8908        | 0.9070        | 0.8541        | 0.8545        | 0.8799        |
|          | 10.0  | 0.8480              | 0.8550        | 0.8378        | 0.8396        | 0.8444        | 0.8565        | 0.8206        | 0.8290        | 0.8453        |
| IJI      | 1.5   | 0.7097              | 0.5940        | 0.8223        | 0.8008        | 0.8379        | 0.7977        | 0.7623        | 0.8075        | 0.8073        |
|          | 3.0   | 0.8013              | 0.7766        | 0.8419        | 0.8788        | 0.8715        | 0.8229        | 0.8253        | 0.8067        | 0.8478        |
|          | 5.0   | <b>0.8627</b>       | 0.8688        | <b>0.8648</b> | <b>0.9117</b> | <b>0.8859</b> | 0.8482        | 0.8603        | <b>0.8473</b> | <b>0.8762</b> |
|          | 8.0   | 0.8565              | <b>0.8768</b> | 0.8614        | 0.9020        | 0.8749        | <b>0.8602</b> | <b>0.8689</b> | 0.8446        | 0.8755        |
|          | 10.0  | 0.8178              | 0.8499        | 0.8283        | 0.8564        | 0.8296        | 0.8326        | 0.8417        | 0.8365        | 0.8341        |
| LPI      | 1.5   | 0.8155              | 0.6935        | 0.8412        | 0.7477        | 0.8919        | 0.9093        | 0.8198        | 0.8040        | 0.7957        |
|          | 3.0   | 0.8830              | 0.8153        | 0.8647        | 0.8387        | 0.8901        | 0.9113        | 0.8375        | 0.8338        | 0.8432        |
|          | 5.0   | <b>0.9091</b>       | <b>0.9014</b> | <b>0.8767</b> | <b>0.8926</b> | <b>0.8971</b> | <b>0.9137</b> | 0.8476        | <b>0.8503</b> | <b>0.8781</b> |
|          | 8.0   | 0.8846              | 0.8959        | 0.8627        | 0.8910        | 0.8883        | 0.8886        | <b>0.8579</b> | 0.8480        | 0.8753        |
|          | 10.0  | 0.8428              | 0.8497        | 0.8205        | 0.8523        | 0.8389        | 0.8424        | 0.8252        | 0.8151        | 0.8397        |
| PLAND    | 1.5   | 0.7138              | 0.6305        | 0.7298        | 0.6829        | 0.7602        | 0.7735        | 0.7084        | 0.7125        | 0.7014        |
|          | 3.0   | 0.7566              | 0.7269        | 0.7552        | 0.7384        | 0.7643        | 0.7780        | 0.7345        | 0.7299        | 0.7256        |
|          | 5.0   | <b>0.7710</b>       | <b>0.7727</b> | <b>0.7580</b> | <b>0.7654</b> | <b>0.7653</b> | <b>0.7805</b> | <b>0.7429</b> | 0.7353        | <b>0.7488</b> |
|          | 8.0   | 0.7562              | 0.7616        | 0.7431        | 0.7582        | 0.7501        | 0.7613        | 0.7373        | <b>0.7399</b> | 0.7415        |
|          | 10.0  | 0.7298              | 0.7378        | 0.7205        | 0.7393        | 0.7264        | 0.7358        | 0.7217        | 0.7248        | 0.7290        |

|              |      |               |               |               |               |               |               |               |               |               |
|--------------|------|---------------|---------------|---------------|---------------|---------------|---------------|---------------|---------------|---------------|
| SHAPE_<br>MN | 1.5  | 0.7768        | 0.6278        | 0.8512        | 0.7420        | 0.8812        | 0.8700        | 0.7919        | 0.7860        | 0.7953        |
|              | 3.0  | 0.8684        | 0.7971        | <b>0.8719</b> | 0.8043        | 0.8938        | 0.8677        | 0.8440        | 0.8129        | 0.8241        |
|              | 5.0  | <b>0.9052</b> | 0.8812        | 0.8715        | 0.8433        | <b>0.8977</b> | <b>0.8750</b> | 0.8648        | 0.8455        | 0.8486        |
|              | 8.0  | 0.8889        | <b>0.8857</b> | 0.8623        | <b>0.8549</b> | 0.8758        | 0.8655        | <b>0.8668</b> | <b>0.8594</b> | <b>0.8645</b> |
|              | 10.0 | 0.8493        | 0.8487        | 0.8425        | 0.8212        | 0.8307        | 0.8322        | 0.8366        | 0.8314        | 0.8308        |

| Variable            | Scale       | NATURAL AND<br>HUMAN<br>DISTURBANCE<br>METRICS |  |  |  | Variable | Scale      | LANDSCAPE<br>LEVEL<br>METRICS |  |  |  |
|---------------------|-------------|------------------------------------------------|--|--|--|----------|------------|-------------------------------|--|--|--|
|                     |             |                                                |  |  |  |          |            |                               |  |  |  |
|                     |             |                                                |  |  |  |          |            |                               |  |  |  |
| Road<br>density     | 1.5         | 0.6620                                         |  |  |  | PD       | 1.5        | 0.8265                        |  |  |  |
|                     | 3.0         | 0.6949                                         |  |  |  |          | 3.0        | 0.8376                        |  |  |  |
|                     | 5.0         | 0.7113                                         |  |  |  |          | 5.0        | 0.8589                        |  |  |  |
|                     | <b>8.0</b>  | <b>0.7178</b>                                  |  |  |  |          | <b>8.0</b> | <b>0.8632</b>                 |  |  |  |
|                     | 10.0        | 0.7178                                         |  |  |  |          | 10.0       | 0.8306                        |  |  |  |
| Waterway<br>density | 1.5         | 0.5590                                         |  |  |  | SHDI     | 1.5        | 0.8088                        |  |  |  |
|                     | 3.0         | 0.5787                                         |  |  |  |          | 3.0        | 0.8219                        |  |  |  |
|                     | 5.0         | 0.5825                                         |  |  |  |          | 5.0        | 0.8517                        |  |  |  |
|                     | 8.0         | 0.6035                                         |  |  |  |          | <b>8.0</b> | <b>0.8568</b>                 |  |  |  |
|                     | <b>10.0</b> | <b>0.6160</b>                                  |  |  |  |          | 10.0       | 0.8364                        |  |  |  |
| Roughnes<br>s       | 1.5         | 0.6019                                         |  |  |  |          |            |                               |  |  |  |
|                     | 3.0         | 0.5901                                         |  |  |  |          |            |                               |  |  |  |
|                     | 5.0         | 0.6200                                         |  |  |  |          |            |                               |  |  |  |
|                     | 8.0         | 0.6351                                         |  |  |  |          |            |                               |  |  |  |
|                     | <b>10.0</b> | <b>0.6775</b>                                  |  |  |  |          |            |                               |  |  |  |

**Table S2.**

AUC for optimized scale selection of the variables for roosting.

| Variable | Scale | CLASS LEVEL METRICS |               |               |               |               |               |               |               |               |
|----------|-------|---------------------|---------------|---------------|---------------|---------------|---------------|---------------|---------------|---------------|
|          |       | Artificial          | Forest        | Grassland     | Lake          | Marsh         | Mudflat       | Paddy field   | Pond          | River         |
| AI       | 0.1   | 0.5380              | 0.5380        | 0.5209        | 0.5668        | 0.5865        | 0.7049        | 0.5277        | 0.5262        | 0.5048        |
|          | 0.5   | 0.5708              | 0.5622        | 0.6608        | 0.6299        | 0.7076        | 0.7877        | 0.6118        | 0.5564        | 0.5760        |
|          | 1.0   | 0.6431              | 0.5772        | 0.7383        | 0.6848        | 0.7635        | <b>0.7977</b> | 0.6774        | 0.6648        | 0.6727        |
|          | 1.5   | <b>0.6994</b>       | <b>0.6173</b> | <b>0.7783</b> | <b>0.6961</b> | <b>0.7909</b> | 0.7976        | <b>0.7205</b> | <b>0.7154</b> | <b>0.7332</b> |
| AM       | 0.1   | 0.5441              | 0.5418        | 0.5322        | 0.5707        | 0.5985        | 0.7208        | 0.5332        | 0.5317        | 0.5066        |
|          | 0.5   | 0.6020              | 0.5673        | 0.6615        | 0.6347        | 0.7094        | 0.7955        | 0.6242        | 0.5754        | 0.5749        |
|          | 1.0   | 0.6748              | 0.5989        | 0.7377        | 0.6828        | 0.7670        | <b>0.7998</b> | 0.7010        | 0.6747        | 0.6740        |
|          | 1.5   | <b>0.7229</b>       | <b>0.6368</b> | <b>0.7779</b> | <b>0.7032</b> | <b>0.7922</b> | 0.7970        | <b>0.7393</b> | <b>0.7165</b> | <b>0.7333</b> |
| COHESI   | 0.1   | 0.5413              | 0.5402        | 0.5290        | 0.5654        | 0.5850        | 0.7089        | 0.5293        | 0.5267        | 0.5054        |
|          | 0.5   | 0.5869              | 0.5652        | 0.6486        | 0.6307        | 0.7087        | 0.7956        | 0.6160        | 0.5645        | 0.5753        |
|          | 1.0   | 0.6514              | 0.5776        | 0.7251        | 0.6791        | 0.7679        | <b>0.8064</b> | 0.6780        | 0.6810        | 0.6735        |
| ED       | 1.5   | <b>0.7064</b>       | <b>0.6209</b> | <b>0.7663</b> | <b>0.6969</b> | <b>0.7925</b> | 0.8057        | <b>0.7220</b> | <b>0.7306</b> | <b>0.7236</b> |
|          | 0.1   | 0.5636              | 0.5511        | 0.5446        | 0.5766        | 0.6255        | 0.7260        | 0.5161        | 0.5365        | 0.5013        |

|        |     |               |               |               |               |               |               |               |               |               |
|--------|-----|---------------|---------------|---------------|---------------|---------------|---------------|---------------|---------------|---------------|
| III    | 0.5 | 0.6359        | 0.5758        | 0.7180        | 0.6750        | 0.8007        | 0.8902        | 0.5935        | 0.5835        | 0.6119        |
|        | 1.0 | 0.7266        | 0.6211        | 0.7930        | 0.7323        | 0.8775        | 0.9199        | 0.7207        | 0.7503        | 0.7466        |
|        | 1.5 | <b>0.8267</b> | <b>0.7045</b> | <b>0.8343</b> | <b>0.7830</b> | <b>0.9161</b> | <b>0.9290</b> | <b>0.7969</b> | <b>0.8359</b> | <b>0.8043</b> |
|        | 0.1 | 0.5457        | 0.5355        | 0.5279        | 0.5186        | 0.5826        | 0.6046        | 0.5006        | 0.5323        | 0.5030        |
|        | 0.5 | 0.5554        | 0.5699        | 0.7082        | 0.6790        | 0.7547        | 0.8321        | 0.5767        | 0.5994        | 0.6040        |
|        | 1.0 | 0.5906        | 0.5851        | 0.7731        | 0.7707        | 0.8073        | <b>0.8211</b> | 0.6939        | 0.7511        | 0.7523        |
|        | 1.5 | <b>0.7296</b> | <b>0.5924</b> | <b>0.8287</b> | <b>0.8214</b> | <b>0.8547</b> | 0.8043        | <b>0.7548</b> | <b>0.8263</b> | <b>0.8130</b> |
|        | 0.1 | 0.5632        | 0.5632        | 0.5417        | 0.6051        | 0.6594        | 0.7875        | 0.5411        | 0.5341        | 0.5038        |
|        | 0.5 | 0.6296        | 0.5875        | 0.7083        | 0.6672        | 0.8044        | 0.9043        | 0.6388        | 0.5775        | 0.6234        |
|        | 1.0 | 0.7326        | 0.6264        | 0.7978        | 0.7420        | 0.8851        | 0.9263        | 0.7556        | 0.7341        | 0.7414        |
|        | 1.5 | <b>0.8302</b> | <b>0.6996</b> | <b>0.8500</b> | <b>0.7758</b> | <b>0.9089</b> | <b>0.9296</b> | <b>0.8215</b> | <b>0.8223</b> | <b>0.7973</b> |
|        | 0.1 | 0.5452        | 0.5437        | 0.5332        | 0.5707        | 0.6017        | 0.7212        | 0.5359        | 0.5339        | 0.5088        |
| PLAND  | 0.5 | 0.6078        | 0.5689        | 0.6490        | 0.6340        | 0.7135        | 0.7967        | 0.6230        | 0.5744        | 0.5870        |
|        | 1.0 | 0.6944        | 0.6009        | 0.7156        | 0.6759        | 0.7702        | 0.8069        | 0.6995        | 0.6944        | 0.6767        |
|        | 1.5 | <b>0.7403</b> | <b>0.6465</b> | <b>0.7559</b> | <b>0.7063</b> | <b>0.7949</b> | <b>0.8087</b> | <b>0.7395</b> | <b>0.7426</b> | <b>0.7305</b> |
| SHAPE_ | 0.1 | 0.5684        | 0.5564        | 0.5165        | 0.6051        | 0.6435        | 0.7857        | 0.5172        | 0.5395        | 0.5040        |
|        | 0.5 | 0.6265        | 0.5709        | 0.7119        | 0.6851        | 0.7887        | 0.8866        | 0.5960        | 0.5852        | 0.6077        |
| MN     | 1.0 | 0.6728        | 0.6041        | 0.8083        | 0.7407        | 0.8553        | 0.8941        | 0.7275        | 0.6965        | 0.7520        |
|        | 1.5 | <b>0.7805</b> | <b>0.6329</b> | <b>0.8650</b> | <b>0.7738</b> | <b>0.8950</b> | <b>0.8941</b> | <b>0.7836</b> | <b>0.8001</b> | <b>0.7940</b> |

| Variable         | Scale | NATURAL AND   |             | Variable | Scale | LANDSCAPE     |         |
|------------------|-------|---------------|-------------|----------|-------|---------------|---------|
|                  |       | HUMAN         | DISTURBANCE |          |       | LEVEL         | METRICS |
| Road density     | 0.1   | 0.5746        |             | PD       | 0.1   | 0.7892        |         |
|                  | 0.5   | 0.6347        |             |          | 0.5   | 0.8249        |         |
|                  | 1.0   | 0.6857        |             |          | 1.0   | 0.8391        |         |
|                  | 1.5   | <b>0.7179</b> |             |          | 1.5   | <b>0.8462</b> |         |
| Waterway density | 0.1   | 0.4937        |             | SHDI     | 0.1   | 0.6542        |         |
|                  | 0.5   | 0.5492        |             |          | 0.5   | 0.7919        |         |
|                  | 1.0   | 0.5729        |             |          | 1.0   | 0.8056        |         |
|                  | 1.5   | <b>0.5768</b> |             |          | 1.5   | <b>0.8212</b> |         |
| Roughness        | 0.1   | 0.5302        |             |          |       |               |         |
|                  | 0.5   | 0.5976        |             |          |       |               |         |
|                  | 1.0   | 0.6243        |             |          |       |               |         |
|                  | 1.5   | <b>0.6298</b> |             |          |       |               |         |

**Table S3.**

Component models with  $\Delta AICc < 2$  of the top ranked models for foraging.

| Component models                        | AICc    | $\Delta AICc$ | weight |
|-----------------------------------------|---------|---------------|--------|
| 1/2/3/4/5/6/7/9/10/11/12/13/14/15/16    | 1860.78 | 0.00          | 0.32   |
| 1/2/3/4/5/6/7/9/10/11/12/13/14/15/16/17 | 1861.32 | 0.54          | 0.25   |
| 1/2/3/4/5/6/7/8/9/10/11/12/13/14/15/16  | 1861.50 | 0.72          | 0.23   |

1/2/3/4/5/6/7/8/9/10/11/12/13/14/15/16/17

1861.74

0.96

0.20

Term codes of variables in the component models.

|                   |                      |                    |               |
|-------------------|----------------------|--------------------|---------------|
| AM_forest_5km     | AM_grassland_5km     | EucD_artificial    | EucD_lake     |
| 1                 | 2                    | 3                  | 4             |
| EucD_marsh        | EucD_mudflat         | EucD_river         | EucD_waterway |
| 5                 | 6                    | 7                  | 8             |
| iji_mudflat_8km   | lpi_lake_5km         | lpi_paddyfield_8km | lpi_river_5km |
| 9                 | 10                   | 11                 | 12            |
| PLAND_mudflat_5km | PLAND_paddyfield_5km | Roughness_8km      | Slope         |
| 13                | 14                   | 15                 | 16            |
| Waterseasonality  |                      |                    |               |
| 17                |                      |                    |               |

**Table S4.**Component models with  $\Delta AICc < 2$  of the top ranked models for roosting.

| Component models                   | AICc   | $\Delta AICc$ | weight |
|------------------------------------|--------|---------------|--------|
| 4/5/6/7/8/9/10/11/12/13/17/18      | 820.19 | 0.00          | 0.16   |
| 1/4/5/6/7/8/9/10/11/12/13/17/18    | 820.63 | 0.44          | 0.13   |
| 4/5/6/7/9/10/11/12/13/17/18        | 821.06 | 0.87          | 0.11   |
| 4/5/6/7/8/9/10/11/12/13/17/18/19   | 821.34 | 1.15          | 0.09   |
| 1/4/5/6/7/9/10/11/12/13/17/18      | 821.44 | 1.25          | 0.09   |
| 4/5/6/7/8/9/10/11/12/13/16/17/18   | 821.57 | 1.38          | 0.08   |
| 4/5/6/7/8/9/10/11/12/13/14/17/18   | 821.75 | 1.56          | 0.08   |
| 1/4/5/6/7/8/9/10/11/12/13/17/18/19 | 821.87 | 1.68          | 0.07   |
| 2/4/5/6/7/8/9/10/11/12/13/17/18    | 822.06 | 1.87          | 0.06   |
| 3/4/5/6/7/8/9/10/11/12/13/17/18    | 822.15 | 1.96          | 0.06   |
| 4/5/6/7/8/9/10/11/12/13/15/17/18   | 822.19 | 2.00          | 0.06   |

Term codes of variables in the component models.

|                     |                        |                  |                   |
|---------------------|------------------------|------------------|-------------------|
| AM_forest_1.5km     | AM_grassland_1.5km     | Aspect           | COH_mudflat       |
| 1                   | 2                      | 3                | 4                 |
| EucD_lake           | EucD_marsh             | EucD_river       | EucD_waterway     |
| 5                   | 6                      | 7                | 8                 |
| iji_lake_1.5km      | PLAND_artificial_1.5km | PLAND_lake_1.5km | PLAND_marsh_1.5km |
| 9                   | 10                     | 11               | 12                |
| PLAND_mudflat_1.5km | PLAND_paddyfield_1.5km | PLAND_pond_1.5km | PLAND_river_1.5km |
| 13                  | 14                     | 15               | 16                |
| Recurrence          | Roughness_0.5km        | Slope            |                   |
| 17                  | 18                     | 19               |                   |

**Figure S1.** Correlation matrix of retained variables for final multi-scale habitat modeling of roosting state.

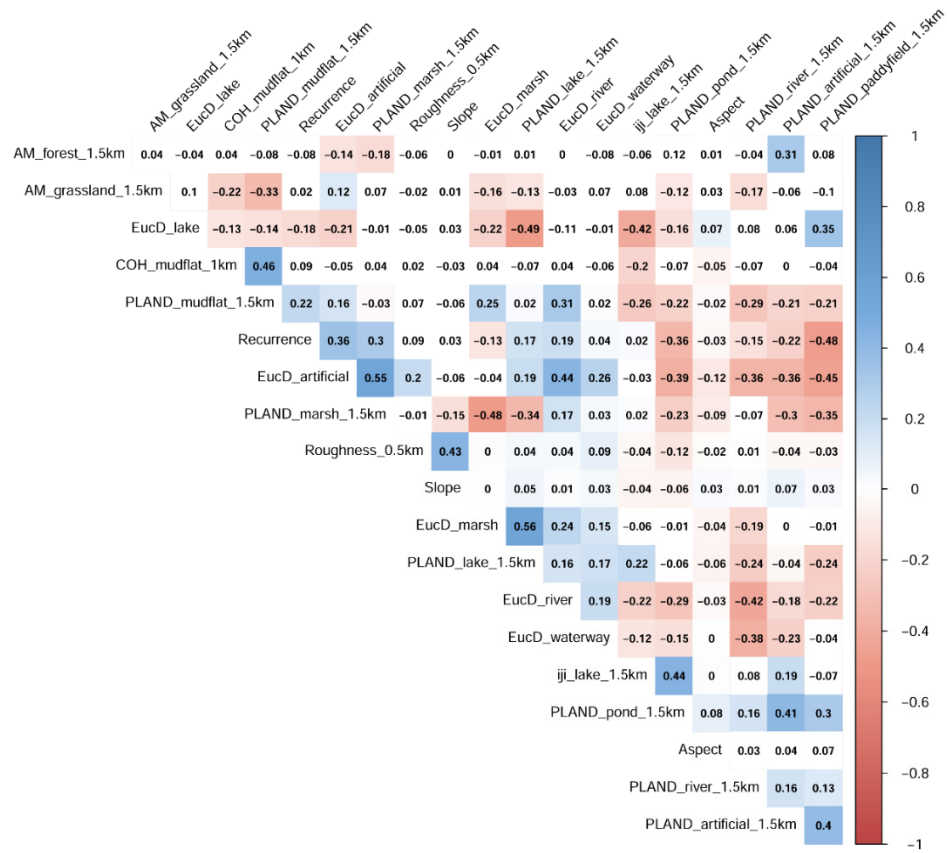

**Figure S2.** Correlation matrix of retained variables for final multi-scale habitat modeling of foraging state.

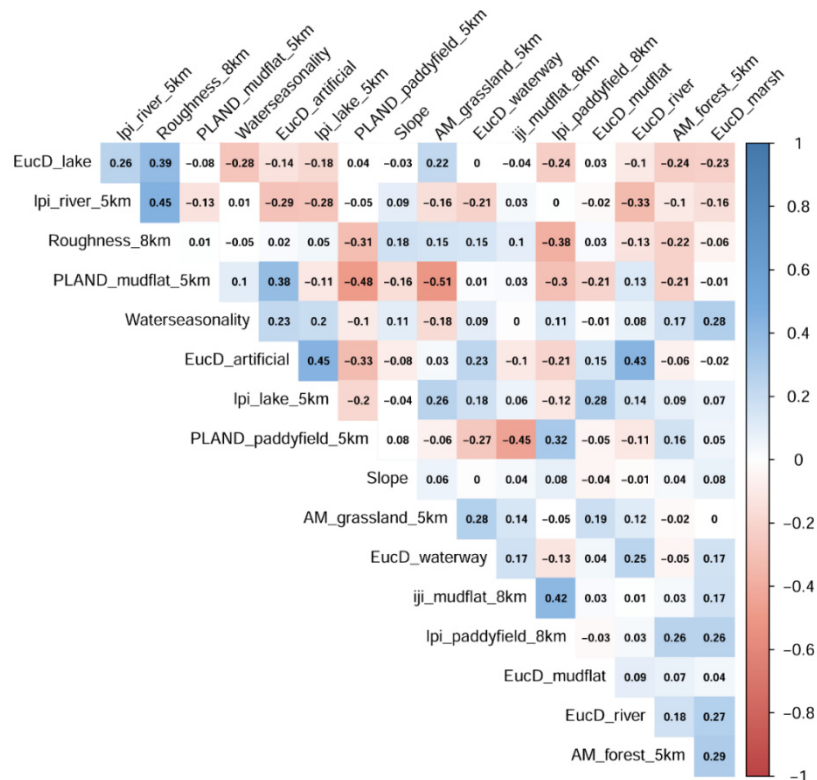

Supplement: s1 [file s1]
